# Supplementary material for: Traditional Gender Differences Create Gaps in the Effect of COVID-19 on Psychological Distress of Japanese Workers
Source: MDPI journal article supplement (doi:10.3390/ijerph18168656), 2021-08-16

**Item 5**

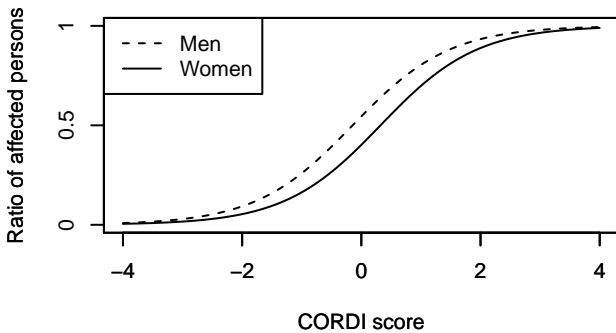

**Item 6**

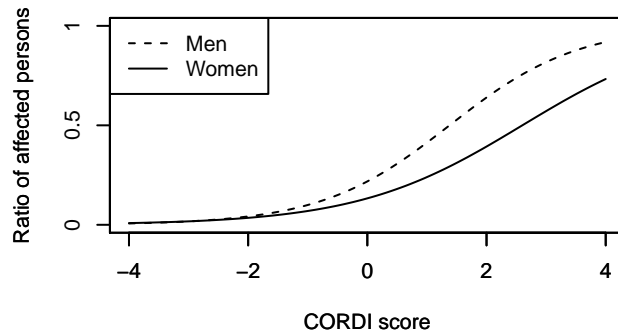

**Item 7**

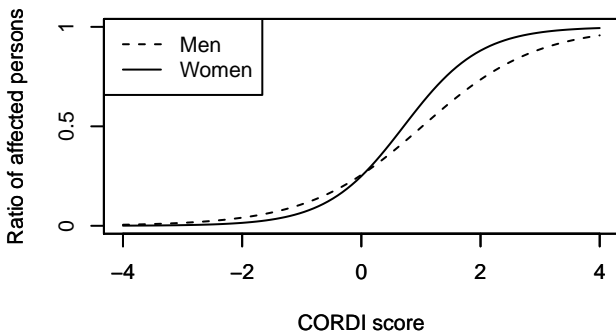

**Item 8**

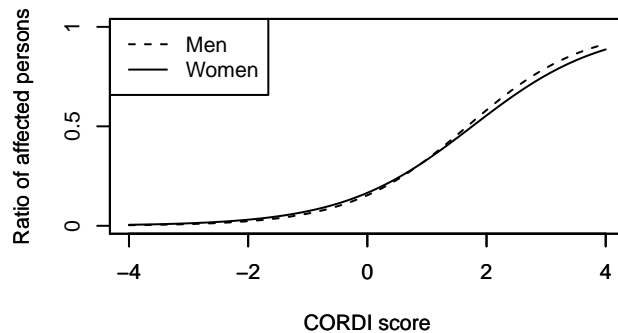

**Item 10**

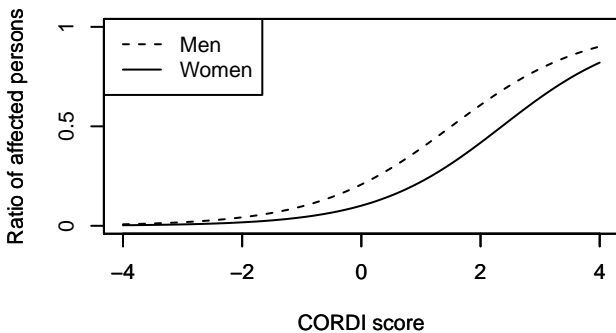

**Item 13**

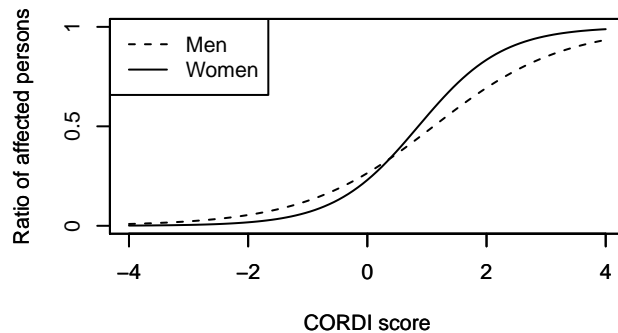

Ratio of affected persons

**Item 15**

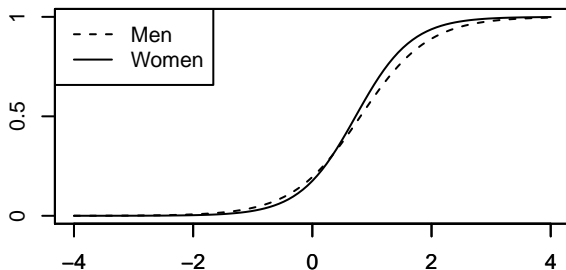

CORDI score

Ratio of affected persons

**Item 17**

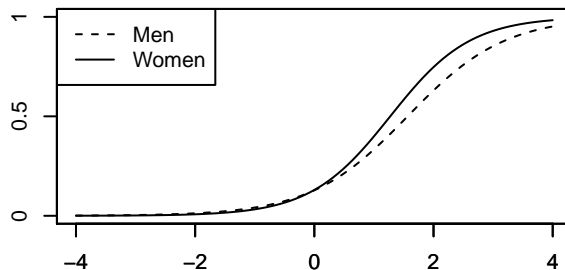

CORDI score

Ratio of affected persons

**Item 23**

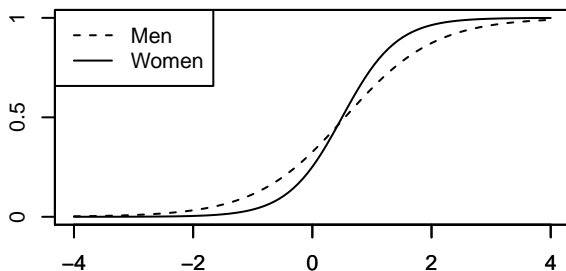

CORDI score

Ratio of affected persons

**Item 24**

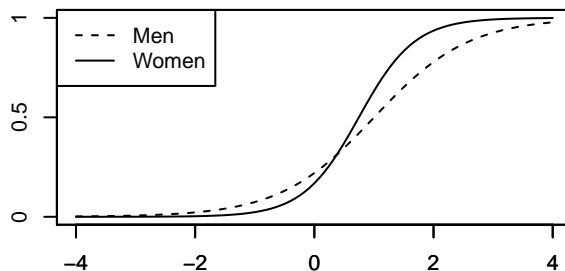

CORDI score

Ratio of affected persons

**Item 25**

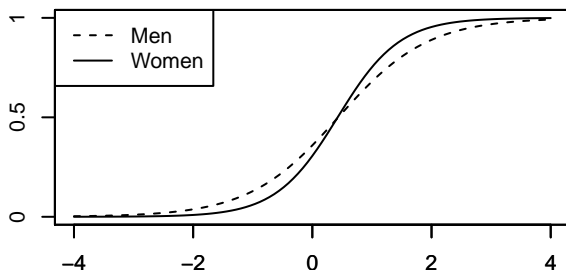

CORDI score

Ratio of affected persons

**Item 29**

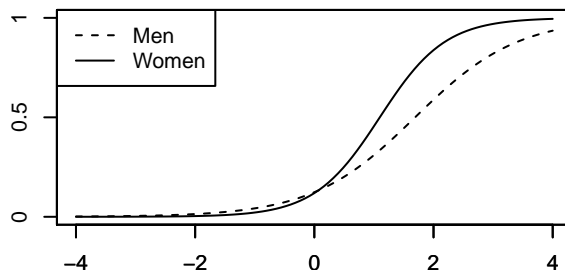

CORDI score

Ratio of affected persons

**Item 31**

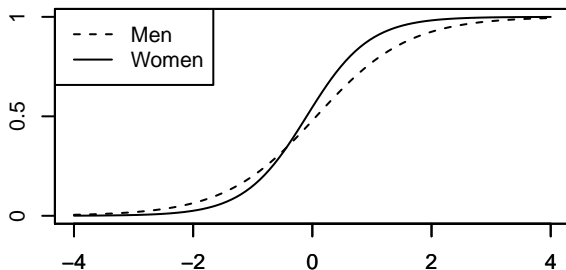

CORDI score

Ratio of affected persons

**Item 33**

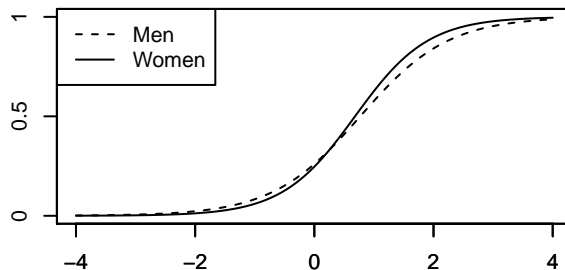

CORDI score

Ratio of affected persons

**Item 34**

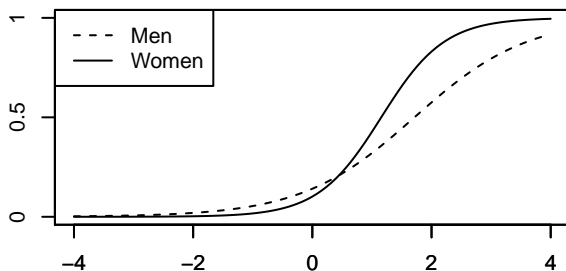

CORDI score

Ratio of affected persons

**Item 35**

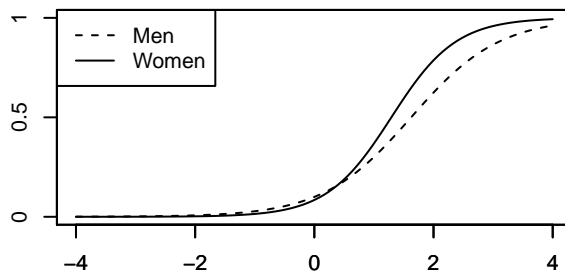

CORDI score

Ratio of affected persons

**Item 38**

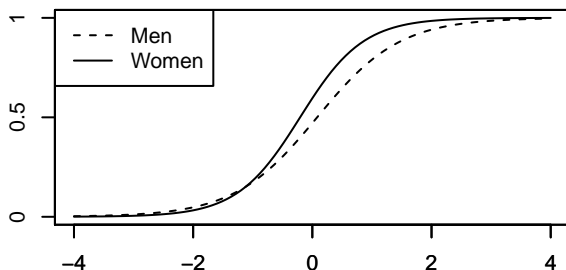

CORDI score

Ratio of affected persons

**Item 39**

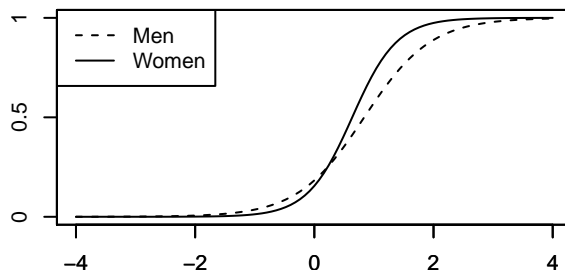

CORDI score

**Col 1**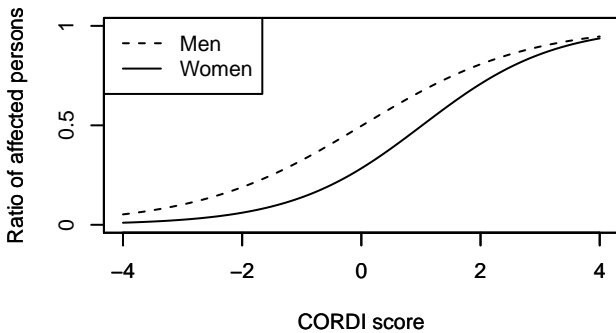**Col 2**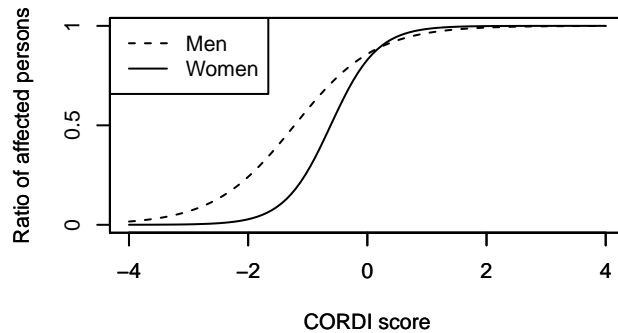**Col 3**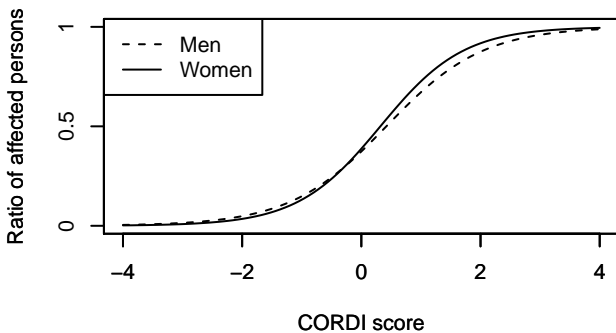**Col 4**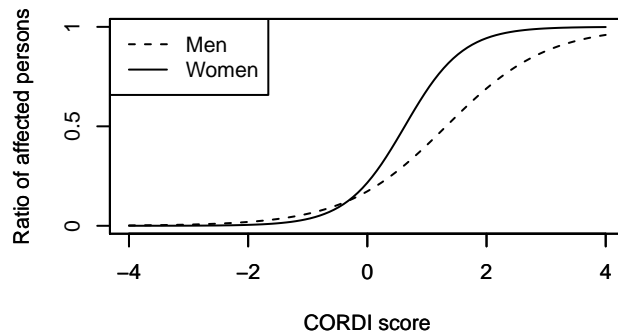**Col 5**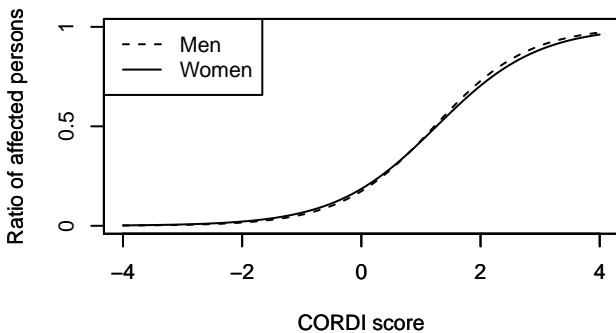

Supplement: s1 [file s1]
